# Supplementary material for: Ethylenediamine assist preparation of carbon dots with novel biomass for highly sensitive detection of levodopa
Source: Royal Society of Chemistry journal article supplement (doi:10.1039/d4ra08240k), 2025-01-01
Supplement: d4ra08240k1.pdf [file d4ra08240k1.pdf]

## Supplementary material

### **Ethylenediamine assist preparation of carbon dots with novel biomass for highly sensitive detection of levodopa**

Zongmei Huang,<sup>a</sup> Jing Li<sup>b</sup> and Lu-Shuang Li<sup>\*a</sup>

<sup>a</sup> Key Laboratory of Tropical Biological Resources of Ministry of Education, School of Pharmaceutical Sciences, Collaborative Innovation Center of One Health, Hainan University, Haikou 570228, China.

<sup>b</sup> Xiangyang Central Hospital, affiliated hospital of Hubei University of Arts & Science, Xiangyang 441021, China.

\*Corresponding Author

E-mail address: lvyli@hainanu.edu.cn (L.-S. Li)

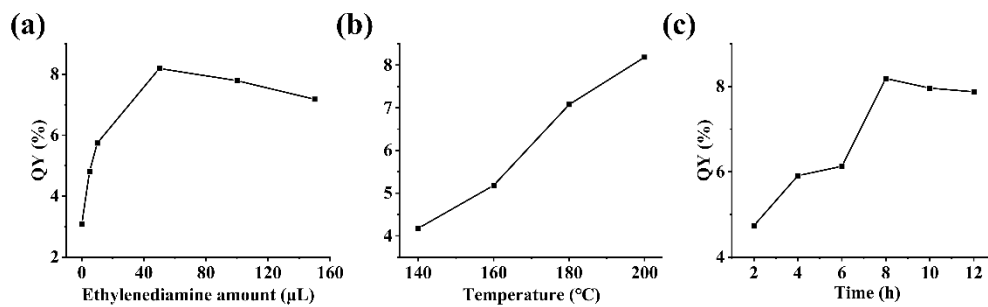

**Fig. S1.** QY of NPCDs prepared with different amounts of EDA (a) at different reaction temperatures (b) and of different reaction time (c).

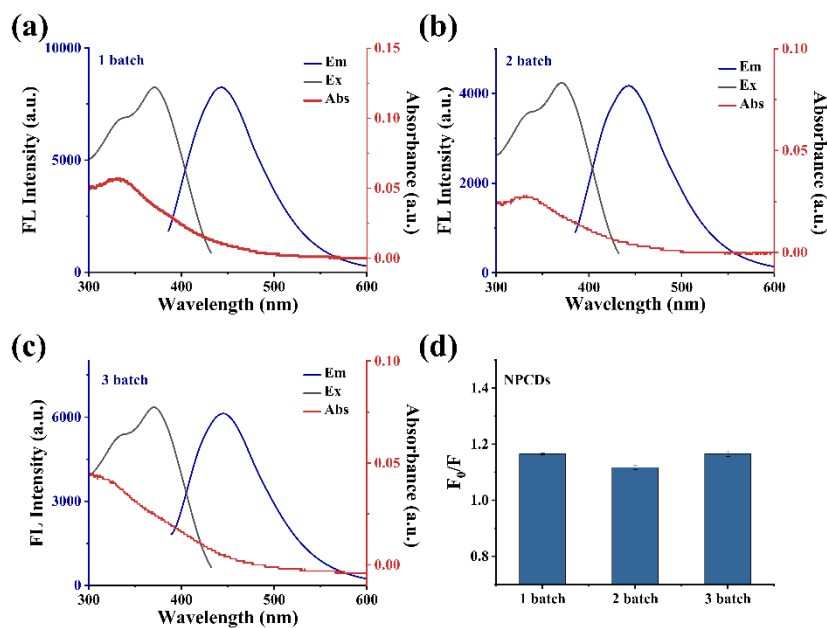

**Fig. S2.** UV-vis absorption (Abs), excitation (Ex) and emission (Em) spectra of NPCDs of first (a), second (b) and third batch (c). (d) The fluorescence response ( $F_0/F$ ) of different batches of NPCDs towards L-Dopa at 10 μM.

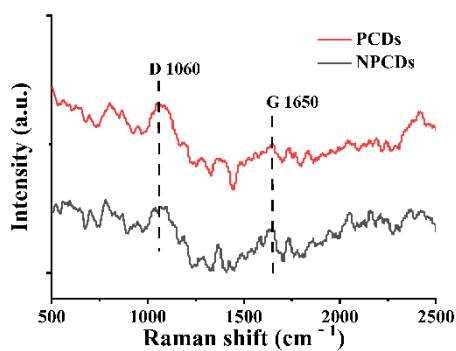

**Fig. S3.** Raman spectra of NPCDs and PCDs.

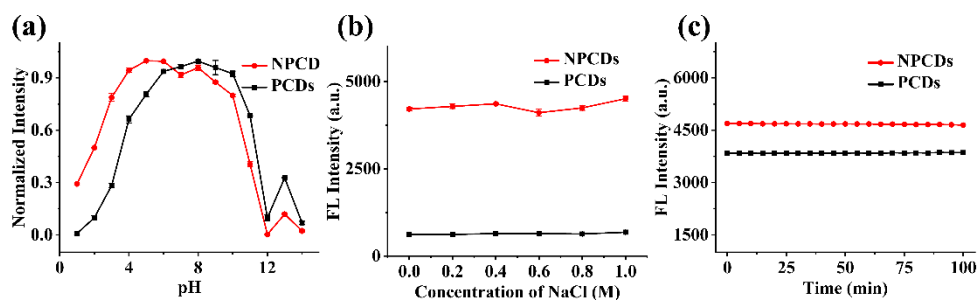

**Fig. S4.** (a) The normalized fluorescence spectra of NPCDs and PCDs at different pH. Fluorescence intensity of NPCDs and PCDs (b) at different NaCl concentrations and (c) different time under continuous UV irradiation.

**Table S1** The QYs of three batches of NPCDs.

| Batch | QY (%) |
|-------|--------|
| 1     | 8.18   |
| 2     | 7.96   |
| 3     | 8.19   |

**Table S2** The content of C, O and N elements in NPCDs and PCDs.

| CDs     | Content (%) |       |      |
|---------|-------------|-------|------|
|         | C           | O     | N    |
| NPCDs   | 50.51       | 47.53 | 1.96 |
| PCDs    | 58.26       | 40.82 | 0.91 |
| Biomass | 42.20       | 50.11 | 2.02 |

**Table S3** The parameters of regression equations of calibration curves for different 3 days.

| Run     | Slope  | Intercept | R <sup>2</sup> |
|---------|--------|-----------|----------------|
| 1       | 0.0119 | 1.0381    | 0.9945         |
| 2       | 0.0123 | 1.0242    | 0.9930         |
| 3       | 0.0119 | 1.0173    | 0.9938         |
| Mean    | 0.0120 | 1.0265    | 0.9938         |
| RSD (%) | 1.92   | 1.03      | –              |

**Table S4** Intra-day and inter-day accuracy and precision of the sensor in the detection of L-Dopa. Samples were prepared on same day (n=3) for intra-day assessments, and 3 different days (n=3) for inter-day assessments.

| Conc.<br>( $\mu$ M) | Intra-day        |              |               | Inter-day        |              |               |
|---------------------|------------------|--------------|---------------|------------------|--------------|---------------|
|                     | Mean $\pm$ SD    | Accuracy (%) | Precision (%) | Mean $\pm$ SD    | Accuracy (%) | Precision (%) |
| 5                   | 4.61 $\pm$ 0.11  | 92.11        | 2.40          | 5.21 $\pm$ 0.46  | 104.27       | 8.89          |
| 20                  | 19.37 $\pm$ 0.21 | 96.83        | 1.06          | 19.14 $\pm$ 0.60 | 95.69        | 3.12          |

---

|    |              |       |      |              |       |      |
|----|--------------|-------|------|--------------|-------|------|
| 60 | 57.18 ± 1.07 | 95.31 | 1.88 | 59.15 ± 1.80 | 98.58 | 3.05 |
|----|--------------|-------|------|--------------|-------|------|

---

**Table S5** Detection of L-Dopa in FBS.

---

| Sample | Added (μM) | Measured (μM) | RSD (%) | Recovery (%) |
|--------|------------|---------------|---------|--------------|
| 1      | 10         | 9.97          | 2.99    | 99.71        |
| 2      | 20         | 19.70         | 2.08    | 98.50        |
| 3      | 60         | 53.10         | 2.30    | 88.50        |

---
